# Supplementary material
Source: publisher figshare collection journal article supplement (https://future-science-group.figshare.com/ndownloader/files/24910976)
Supplement: Supplementary file 1 [file 24910976]

## REAGENTS

| PRODUCT          | CATALOGUE  | COMPANY        |
|------------------|------------|----------------|
| 96 WELL PLATE    | 30096      | HIMEDIA        |
| ACRIDINE ORANGE  | TC262      | HIMEDIA        |
| AGAROSE          | A9539      | HIMEDIA        |
| ANTIBIOTIC       | A002       | HIMEDIA        |
| B-27 SUPPLEMENT  | 17504-044  | GIBCO          |
| CALCIEN AM       | C1430      | INVITROGEN     |
| DMEM             | AL151A     | HIMEDIA        |
| HOECHST 33342    | TC266      | HIMEDIA        |
| HUMAN EGF        | #AF-100-15 | PEPROTECH      |
| HUMAN FGF        | #100-18B   | PEPROTECH      |
| MEM              | AL07S      | HIMEDIA        |
| MEM NEAA         | ACL005     | HIMEDIA        |
| MitoView™ 633    | 70055-T    | Biotium        |
| MTT              | 102227     | MP BIOMEDICALS |
| PLATES           | 70096      | GENETIX        |
| PROPIDIUM IODIDE | TC252      | HIMEDIA        |
| T25 FLASKS       | 70025      | GENETIX        |
| TEMOZOLOMIDE     | SC-203292  | CHEM CRUZ      |
| TRYPSIN          | TCL007     | HIMEDIA        |

## RECEIPES:

- **MEDIA PREPARATION:**

**For 50 ml complete media:** 40 ml DMEM/MEM in 50 ml falcon and add [1X] antibiotic, 10% FBS, maintain the volume to 50 ml with the media.

**For 50 mL conditional media,** 40 ml DMEM in 50 mL falcon and add [1x] antibiotic, [1x] B27 supplement, 20 ng/ml Human EGF, 20 ng/mL human FGF and maintain the volume to 50 mL.

- **BEDDING WITH AGAROSE:**

We used 0.9% agarose, for that dissolve 0.9 gm of agarose in 100 ml of autoclave PBS. To make a bed in 96 well plate, we used 50 uL agarose per well and it to solidify. Usually it takes 5-8 minutes to solidify.

- **DRUG AND DYES:**

**TEMOZOLOMIDE (TMZ):**

**Stock:** 10 mM dissolved in DMSO, working concentration 100 µM.

**CALCEIN-AM:**

**Stock:** 1M dissolved in DMSO, working concentration: 5  $\mu$ M

**PROPIDIUM IODIDE:**

**Stock:** 10  $\mu$ g/mL dissolved in PBS, working concentration: 10  $\mu$ g/mL

**HOECHST 33324:**

**Stock:** 10 mg/ml dissolved in PBS, working concentration: 10  $\mu$ g/mL

**ACRIDINE ORANGE:**

**Stock:** 10 mg/ml dissolved in PBS, working concentration: 10  $\mu$ g/mL
